# Supplementary material for: Compassionate communication: a scoping review
Source: Frontiers journal article supplement (doi:10.3389/fcomm.2023.1294586), 2024-01-05
Supplement: Table_2.DOCX [file Table_2.DOCX]

**Table 2***. Characteristics of the finalised articles*

| **Author/s & Publication Year** | **Country of study** | **Sample characteristics** | **Study Setting** | **Research Design** |
| --- | --- | --- | --- | --- |
| Bayne et al., 2013 | United States | 21 medical professionals representing multiple specialty areas and employed in a teaching hospital, private practice, or clinical setting; 57% males; mean age- 50 years (25–73) | Healthcare | Qualitative |
| Miller, 2007 | United States | 23 employees working in occupations demanding compassion (nurse, physician, counsellor, pastor, chaplain, psychologist, therapist, social worker, funeral director, forensic interviewer and massage therapist); 10 women & 13 men | Multiple | Qualitative |
| Suwinyattichaiporn et al., 2021 | United States | 535 students; 320 females & 250 males; average age- 21.22 years | Educational | Mixed-method |
| Way & Tracy, 2012 | United States | 96 hospice employees (nurses, aides, social workers, spiritual care providers, staff, maintenance workers, doctors, etc.); 75% were female employees | Healthcare | Qualitative |
| Cameron et al., 2015 | United States | Oncologists (n = 17; mean age-46.4; 4 males & 13 females) and their patients with advanced cancer (n = 38; age- 63.7; 13 males & 25 females) | Healthcare | Qualitative |
| İbrahimoğlu et al., 2021 | Turkey | 319 nursing students; 244 females | Healthcare | Observational |
| Huffman, 2017 | United States | Homeless and at-risk young adults (18-24 age) | Social work | Qualitative |
| Taylor & Hodgson, 2020 | United Kingdom | Medical Radiation Technologists and their patients (n= 63) | Healthcare | Qualitative |
| Powers & Myers, 2020 | United States | 2,067 practicing attorneys; 1,092 males & 967 females, with almost half of the participants (48.1%) reporting their ages as below 45. | Other- workplaces of individuals in the legal profession | Observational |
| Snyder, 2012 | NR | 159 caregivers; 123 females; average age- 42.57 years (21-75) | Social work | Observational |
| Jo et al., 2019 | Korea | 267 nurses; 37 males (13.9%) and 230 females (86.1%) | Healthcare | Observational |
| Sinclair et al., 2018 | Canada | 57 healthcare providers from palliative care services; Mean age- 48.6 years; 8 men & 49 women | Healthcare | Qualitative |
| Schreckenbach et al., 2018 | Germany | 245 medical students; mean age- 23.25 ± 2.48 years; 155 female students | Healthcare | Observational |
| Lynch et al., 2019 | United Kingdom | 74 workers (social workers, child practitioners & parent support workers); 65 females & 8 males | Social work | Mixed-method |
| Tracy & Huffman, 2017 | United States | Interaction between a would-be school shooter and a school bookkeeper | Unspecified | Qualitative |
| Bottino et al., 2020 | United States | Communication between a paediatric primary care provider and the mother of a medically complex child | Healthcare | Qualitative |
| McArthur & Fitzgerald, 2013 | Australia | 24 veterinarians (67% were female; aged between 18 and 40 years) and 64 clients | Healthcare | Observational |
| Falconer et al., 2019 | United Kingdom | 54 participants (42 females; mean age- 33.5) | Unspecified | Mixed-method |
| Pounds et al., 2018 | United Kingdom | 58 humanities students; 42 females & 16 males | Educational | Qualitative |
| Kelly et al., 2020 | Canada | 15 physicians; 7 women and 8 men | Healthcare | Qualitative |
| Strekalova et al., 2019 | United States | 343 undergraduate nursing students (both male & female) | Healthcare | Qualitative |
| Ozcan et al., 2010 | Turkey | 466 nursing students of whom 438 participated in the cross-sectional study and 81 in the longitudinal study | Healthcare | Observational |
| Pfeil & Zaphiris, 2007 | United Kingdom | 47 older people aged 50 and above | Social work | Qualitative |
| Cox & Dannahy, 2005 | United Kingdom | 3 students doing master's degree | Educational | Qualitative |
| Ritter, 2009 | United States | 14 freshmen and 19 senior volunteers from a school; 17 females & 16 males; mean age of students in the two groups in years and months was 14-11 and 17-11, respectively. | Educational | Observational |
| Salazar, 2013 | United States | Qualitative phase: 54 college students; 28 men & 26 women;  Quantitative phase 1: 325 young adult college students; 166 men & 159 women; 18-28 years of age;  Quantitative phase 2: 565 college students; 280 men & 285 women; 17-42 years of age;  Quantitative phase 3: 518 college students; 256 men & 262 women; Mean age- 24 (17-42);  Quantitative phase 4: 105 pairs of relational partners involved in friendships or romantic relationships (total n= 210; 29 romantic partner pairs, 12 cross sex friendship pairs, and 64 same sex friendship pairs); 76 males & 134 females; Average age- 21.47 years (18-46) | Multiple | Mixed-method |
| Meinecke & Kauffeld, 2019 | Germany | 48 supervisors (4 females & 44 males; mean age- 41.38 years, 27 to 56 years) and 48 employees (4 females & 44 males; mean age- 40.44 years, 20 to 58 years) working within the fields of engineering. | Other- workplaces of professionals in the field of engineering | Mixed-method |
| Araújo et al., 2019 | Portugal | 32 professionals representing a range of Portuguese organizations and institutional sectors; Ages ranged between 36- 66 years | Multiple | Qualitative |
| #Grondin et al., 2019 | NA | NA | NA | NA |
| Archer & Meyer, 2021 | South Africa | Eighteen medical students; 9 males & 9 females | Healthcare | 1 group post-test (qualitative) |
| Zandkarimi et al., 2019 | Iran | 50 girls of the vulnerable socio-economic income groups from charity centres (25 in Experimental Group and 25 in Control group); 11-18 age group | Social work | RCT |
| Nafise & Ghazal, 2018 | Iran | 30 girls from charity centres (15 in Experimental group & 15 in Control group); 11-19 age group | Social work | RCT |
| Museux et al., 2016 | Canada | 2 interprofessional teams (N = 9) consisting of women from healthcare and social services sector | Multiple | Mixed-method |
| Nosek et al., 2014 | United States | 55 nursing students, average age- 19 years (18-20); 6 males & 49 females | Healthcare | Mixed-method |
| Marlow et al., 2012 | United States | 30 male parolees enrolled in substance abuse treatment; mean age- 42 | Healthcare | Mixed-method |
| Suarez et al., 2014 | United States | Study 1- 885 male prison inmates; Average age- 37.2 years;  Study 2- 26 male prison inmates (13 in Experimental group & 13 in Control group); Average age- 42 (24-66) | Unspecified | Mixed-method |
| Yang & Kim, 2020 | Korea | 47 patients who were hospitalized in the alcoholic wards of two psychiatric hospitals (23 in Control group, 12-13 participants in each experimental group, one group each from the 2 psychiatric hospital); Average age- 50.5 years (25-75); 42 men & 5 women | Healthcare | Mixed-method |
| Nosek & Durán, 2017 | United States | 20 adults (consisting of 15 women; mean age 43.7; Type of work included handyman, carpenter, and physical education teacher for the men, and nanny, housecleaner, medical coder, client services, financial services, store manager, and library assistant for the females) and 18 youth (consisting of 10 girls; mean age- 13 years ranging from 9 to 17) | Unspecified | 1 group pre-post-test (qualitative) |
| Vazhappilly & Reyes, 2017 | Philippines | 12 couples (6 males & 6 females) aged between 28 and 52 years | Family | 1 group pre-post-test (quantitative) |
| Wacker & Dziobek, 2018 | Germany | 29 health professionals in experimental group (mean age- 49.2; 85% females) and 27 in control group (mean age- 47.3; 89% females) | Healthcare | Mixed-method |
| Hindiarto et al., 2020 | Indonasia | 496 hospice employees (221 medical and 29 non-medical) both the medical and non-medical staff; 250 in experimental group (26 males & 224 females) and 246 in control group; all age groups | Healthcare | RCT |
| Mann et al., 2020 | United States | A total of 74 healthcare staff completed the initial pre-training surveys and 50 healthcare staff completed post-training surveys; all age groups | Healthcare | 1 group pre-post-test (quantitative) |
| Nerdrum & Høglend, 2003 | Norway | 32 students (2 males and 30 females; mean age- 28.1 years) in experimental group and 27 students (3 males and 24 females; mean age- 30.5 years) in control group | Educational | RCT |
| O¨ zcan et al, 2011 | Turkey | 48 female nursing students; mean age- 21.77 years | Healthcare | 1 group pre-post-test (quantitative) |
| Ruiz-Moral et al., 2017 | Spain | 115 medical students; 84 women; average age 22 years | Healthcare | 1 group pre-post-test (quantitative) |
| Jakowich, 2020 | United States | mixed-age class (5-10 years) of 20 enrolled students; 11 females & 9 males | Educational | Mixed-method |
| Nerdrum & Lundquist, 2008 | Norway | 39 social work students in experimental group (mean age- 28.3 years; 4 male & 35 females) and 39 social work students in control group (mean age- 30.9 years; 7 male and 32 females). | Educational | RCT |
| Pehrson et al., 2016 | Qatar | 248 inpatient nurses (99% female, 1% male) varied in age | Healthcare | 1 group pre-post-test (quantitative) |
| Kataoka et al., 2019 | Japan | 116 medical students; 42 males | Healthcare | 1 group pre-post-test (quantitative) |
| Ançel, 2006 | Turkey | 190 nurses working in inpatient wards; 50.0% were 24 years old or younger, 35.8% were between 25 and 30 years, 14.2% were 31 years  and above | Healthcare | 1 group pre-post-test (quantitative) |
| D’souza et al., 2020 | India | 71 medical students were randomized at baseline, with 33 students in the experimental group and 38 in control group; mean age-19 years; 35 females & 45 males | Healthcare | RCT |
| Vazhappilly & Reyes, 2016 | India | Six married couples; Mean age- 37.6 years (27-50) | Family | Mixed-method |
| Alshughry, 2018 | Turkey | 6 livelihood activity teachers and four beneficiaries; Ages ranging from 21 to 54 years | Social work | Mixed-method |
| Taylor & Mamier, 2013 | United States | 200 nurses (student and practising registered nurses); mean age- 35 years (18- 65); 11 males | Healthcare | 1 group pre-post-test (quantitative) |
| Kahriman et al., 2016 | Turkey | 48 nurses (17 in experimental and 31 in control group); mean age- 30 years | Healthcare | RCT |
| Nerdrum & Rønnestad, 2004 | Norway | 23 lay and professional therapists (Experimental group A- 12 therapists, Experimental group B- 11 therapists); 11 females & 12males; mean age-34.2 years; The in-depth interview sample consisted of 5 women & 3 men | Healthcare | Mixed-method |
| Arnesen-Trunzo, 2015 | China | Grade one class of 25 students, aged 6 - 7 | Educational | 1 group post-test (qualitative) |

***Note:*** - *Only the* *information that was available to be extracted from each article, could be reported in the table*

***Abbreviations-*** *NR: Not reported; NA: Not applicable; RCT: Randomized Control Trial*

***#-*** *Indicates review article entailing conceptual framework of compassionate communication in computer-mediated interactions*
